# Supplementary material for: Spatio-temporal tumor heterogeneity in metastatic CRC tumors: a mutational-based approach
Source: PubMed Central journal article supplement (PMC6188146; doi:10.18632/oncotarget.26081), 2018-09-28
Supplement: oncotarget-09-34279-s001.pdf [file oncotarget-09-34279-s001.pdf]

## Spatio-temporal tumor heterogeneity in metastatic CRC tumors: a mutational-based approach

### SUPPLEMENTARY MATERIALS

Supplementary Table 1: Clinical and biological characteristics of sporadic colorectal cancer (sCRC) patients (n=26)

| Clinical Features                             | Total (n=26)   |
|-----------------------------------------------|----------------|
| Age (years)*                                  | 67 (48-79)     |
| <b>Gender</b>                                 |                |
| Female                                        | 7 (27%)        |
| Male                                          | 19 (73%)       |
| <b>Site of primary tumor</b>                  |                |
| Right colon                                   | 4 (16%)        |
| Left colon                                    | 11 (42%)       |
| Rectum                                        | 11 (42%)       |
| <b>Histological type</b>                      |                |
| Adenocarcinoma                                | 25 (96%)       |
| Adenocarcinoma with signet ring cells         | 1 (4%)         |
| <b>Grade of differentiation</b>               |                |
| Well-differentiated                           | 16 (61%)       |
| Moderately differentiated                     | 8 (31%)        |
| Poorly differentiated                         | 2 (8%)         |
| <b>Histopathological tumor classification</b> |                |
| pT2                                           | 1 (4%)         |
| pT3                                           | 19 (73%)       |
| pT4                                           | 6 (23%)        |
| <b>Histopathological lymph node status</b>    |                |
| pN0                                           | 9 (35%)        |
| pN1                                           | 11 (42%)       |
| pN2                                           | 6 (23%)        |
| <b>Metastatic status</b>                      |                |
| M0                                            | 6 (23%)        |
| M1                                            | 20 (77%)       |
| <b>Stage at diagnosis</b>                     |                |
| Stage I                                       | 1 (4%)         |
| Stage IIA                                     | 1 (4%)         |
| Stage IIB                                     | 1 (4%)         |
| Stage IIIB                                    | 3 (11%)        |
| Stage IV                                      | 20 (77%)       |
| <b>Tumor size (cm)*</b>                       | 5.3 (2.5-9)    |
| <b>CEA serum levels*</b>                      | 204 (0.8-1484) |
| ≤5 ng/ml                                      | 4 (15%)        |
| >5 ng/ml                                      | 22 (85%)       |

\*Results expressed as median (range), or number of cases (percentage).

CEA: carcinoembryogenic antigen.
